# Supplementary material for: Antibiotic Resistance and Virulence Profiles of Gram-Negative Bacteria Isolated from Loggerhead Sea Turtles (Caretta caretta) of the Island of Maio, Cape Verde
Source: MDPI journal article supplement (doi:10.3390/antibiotics10070771), 2021-06-24
Supplement: s1 [file s1]

# Supplementary Material - 1

**Table S1.** Sampling data.

| Sample nº. | Date     | Time  | Beach/ local                       | Animal flipper tag ID | PIT             | Sample type |
|------------|----------|-------|------------------------------------|-----------------------|-----------------|-------------|
| 1          | 8/1/2019 | 21h51 | "Praiona", "Pedro Vaz"             | 326/327               | 9.81098(...)258 | cloaca      |
| 2          | 8/1/2019 | 21h51 | "Praiona", "Pedro Vaz"             | 326/327               | 9.81098(...)258 | oral cavity |
| 3          | 8/1/2019 | 21h51 | "Praiona", "Pedro Vaz"             | 326/327               | 9.81098(...)258 | egg         |
| 4          | 8/1/2019 | 23h00 | "Praiona", "Pedro Vaz"             | 329/328               | -               | cloaca      |
| 5          | 8/1/2019 | 23h00 | "Praiona", "Pedro Vaz"             | 329/328               | -               | oral cavity |
| 6          | 8/1/2019 | 23h00 | "Praiona", "Pedro Vaz"             | 329/328               | -               | egg         |
| 7          | 8/1/2019 | 23h21 | "Praiona", "Pedro Vaz"             | 330/331               | -               | cloaca      |
| 8          | 8/1/2019 | 23h21 | "Praiona", "Pedro Vaz"             | 330/331               | -               | oral cavity |
| 9          | 8/1/2019 | 23h21 | "Praiona", "Pedro Vaz"             | 330/331               | -               | egg         |
| 10         | 8/1/2019 | 6h10  | "Praiona", "Pedro Vaz"             | 335/334               | 9.81098(..)250  | cloaca      |
| 11         | 8/1/2019 | 6h10  | "Praiona", "Pedro Vaz"             | 335/334               | 9.81098(...)250 | oral cavity |
| 12         | 8/1/2019 | 6h10  | "Praiona", "Pedro Vaz"             | 335/334               | 9.81098(...)250 | egg         |
| 13         | 8/2/2019 | 22h30 | "Areia Preta", "Praia Gonçalves"   | 104/098               | 9.81098(...)598 | cloaca      |
| 14         | 8/2/2019 | 22h30 | "Areia Preta", "Praia Gonçalves"   | 104/098               | 9.81098(...)598 | oral cavity |
| 15         | 8/2/2019 | 22h30 | "Areia Preta", "Praia Gonçalves"   | 104/098               | 9.81098(...)598 | egg         |
| 16         | 8/2/2019 | 23h32 | "Cozinha fácil", "Praia Gonçalves" | 024/025               | 9.81098(...)803 | cloaca      |
| 17         | 8/2/2019 | 23h32 | "Cozinha fácil", "Praia Gonçalves" | QMI 024/025           | 9.81098(...)803 | oral cavity |
| 18         | 8/2/2019 | 23h32 | "Cozinha fácil", "Praia Gonçalves" | QMI 024/025           | 9.81098(...)803 | egg         |
| 19         | 8/2/2019 | 23h55 | "Cozinha fácil", "Praia Gonçalves" | QMI 064/065           | 9.81098(...)690 | cloaca      |
| 20         | 8/2/2019 | 23h55 | "Cozinha fácil", "Praia Gonçalves" | QMI 064/065           | 9.81098(...)690 | oral cavity |
| 21         | 8/2/2019 | 23h55 | "Cozinha fácil", "Praia Gonçalves" | QMI 064/065           | 9.81098(...)690 | egg         |
| 22         | 8/2/2019 | 01h26 | "Areia Preta", "Praia Gonçalves"   | QMI 099/100           | 9.81098(...)752 | cloaca      |
| 23         | 8/2/2019 | 01h26 | "Areia Preta", "Praia Gonçalves"   | QMI 099/100           | 9.81098(...)752 | oral cavity |
| 24         | 8/2/2019 | 01h26 | "Areia Preta", "Praia Gonçalves"   | QMI 099/100           | 9.81098(...)752 | egg         |
| 25         | 8/2/2019 | 02h10 | "Areia Preta", "Praia Gonçalves"   | QMI 784/783           | 9.81098(...)606 | cloaca      |
| 26         | 8/2/2019 | 02h10 | "Areia Preta", "Praia Gonçalves"   | QMI 784/783           | 9.81098(...)606 | oral cavity |
| 27         | 8/2/2019 | 02h10 | "Areia Preta", "Praia Gonçalves"   | QMI 784/783           | 9.81098(...)606 | egg         |
| 28         | 8/2/2019 | 02h40 | "Areia Preta", "Praia Gonçalves"   | QMI 786/785           | 9.81098(...)330 | cloaca      |
| 29         | 8/2/2019 | 02h40 | "Areia Preta", "Praia Gonçalves"   | QMI 786/785           | 9.81098(...)330 | oral cavity |
| 30         | 8/2/2019 | 02h40 | "Areia Preta", "Praia Gonçalves"   | QMI 786/785           | 9.81098(...)330 | egg         |

Passive Integrated Transponder (PIT).

**Table S1.** *cont.*

| Sample nº. | Date     | Time  | Beach/ local                     | Animal flipper tag ID | PIT             | Sample type |
|------------|----------|-------|----------------------------------|-----------------------|-----------------|-------------|
| 31         | 8/4/2019 | 21h50 | "Areia Preta", "Praia Gonçalo"   | QMI 039/038           | -               | cloaca      |
| 32         | 8/4/2019 | 21h50 | "Areia Preta", "Praia Gonçalo"   | QMI 039/038           | -               | oral cavity |
| 33         | 8/4/2019 | 21h50 | "Areia Preta", "Praia Gonçalo"   | QMI 039/038           | -               | egg         |
| 34         | 8/5/2019 | 00h34 | "Areia Preta", "Praia Gonçalo"   | QMI 051/052           | 9.81098(...)652 | cloaca      |
| 35         | 8/5/2019 | 00h34 | "Areia Preta", "Praia Gonçalo"   | QMI 051/052           | 9.81098(...)652 | oral cavity |
| 36         | 8/5/2019 | 00h34 | "Areia Preta", "Praia Gonçalo"   | QMI 051/052           | 9.81098(...)652 | egg         |
| 37         | 8/5/2019 | 01h20 | "Areia Preta", "Praia Gonçalo"   | QMI 028/029           | 9.81098(...)018 | cloaca      |
| 38         | 8/5/2019 | 01h20 | "Areia Preta", "Praia Gonçalo"   | QMI 028/029           | 9.81098(...)018 | oral cavity |
| 39         | 8/5/2019 | 01h20 | "Areia Preta", "Praia Gonçalo"   | QMI 028/029           | 9.81098(...)018 | egg         |
| 40         | 8/6/2019 | 22h13 | "Cozinha fácil", "Praia Gonçalo" | QMI 062/063           | -               | cloaca      |
| 41         | 8/6/2019 | 22h13 | "Cozinha fácil", "Praia Gonçalo" | QMI 062/063           | -               | oral cavity |
| 42         | 8/6/2019 | 22h13 | "Cozinha fácil", "Praia Gonçalo" | QMI 062/063           | -               | egg         |
| 43         | 8/6/2019 | 22h30 | "Cozinha fácil", "Praia Gonçalo" | QMI 060/061           | -               | cloaca      |
| 44         | 8/6/2019 | 22h30 | "Cozinha fácil", "Praia Gonçalo" | QMI 060/061           | -               | oral cavity |
| 45         | 8/6/2019 | 22h30 | "Cozinha fácil", "Praia Gonçalo" | QMI 060/061           | -               | egg         |
| 46         | 8/6/2019 | 22h47 | "Cozinha fácil", "Praia Gonçalo" | QMI 064/065           | -               | cloaca      |
| 47         | 8/6/2019 | 22h47 | "Cozinha fácil", "Praia Gonçalo" | QMI 064/065           | -               | oral cavity |
| 48         | 8/6/2019 | 22h47 | "Cozinha fácil", "Praia Gonçalo" | QMI 064/065           | -               | egg         |
| 49         | 8/6/2019 | 23h20 | "Cozinha fácil", "Praia Gonçalo" | QMI 066/067           | -               | cloaca      |
| 50         | 8/6/2019 | 23h20 | "Cozinha fácil", "Praia Gonçalo" | QMI 066/067           | -               | oral cavity |
| 51         | 8/6/2019 | 23h20 | "Cozinha fácil", "Praia Gonçalo" | QMI 066/067           | -               | egg         |
| 52         | 8/6/2019 | 00h00 | "Cozinha fácil", "Praia Gonçalo" | QMK 067/068           | -               | cloaca      |
| 53         | 8/6/2019 | 00h00 | "Cozinha fácil", "Praia Gonçalo" | QMK 067/068           | -               | oral cavity |
| 54         | 8/6/2019 | 00h00 | "Cozinha fácil", "Praia Gonçalo" | QMK 067/068           | -               | egg         |
| 55         | 8/6/2019 |       | "Cozinha fácil", "Praia Gonçalo" | KMJ 504/503           | -               | cloaca      |
|            |          | 01h40 |                                  |                       |                 |             |
| 56         | 8/6/2019 | 01h40 | "Cozinha fácil", "Praia Gonçalo" | KMJ 504/503           | -               | oral cavity |
| 57         | 8/6/2019 | 01h40 | "Cozinha fácil", "Praia Gonçalo" | KMJ 504/503           | -               | egg         |
| 58         | 8/8/2019 | 21h53 | "Areia Preta", "Praia Gonçalo"   | QMI 073/072           | 9.81098(...)147 | cloaca      |
| 59         | 8/8/2019 | 21h53 | "Areia Preta", "Praia Gonçalo"   | QMI 073/072           | 9.81098(...)147 | oral cavity |
| 60         | 8/8/2019 | 21h53 | "Areia Preta", "Praia Gonçalo"   | QMI 073/072           | 9.81098(...)147 | egg         |

Passive Integrated Transponder (PIT).

**Table S1.** *cont.*

| <b>Sample nº.</b> | <b>Date</b> | <b>Time</b> | <b>Beach/ local</b>              | <b>Animal flipper tag ID</b> | <b>PIT</b>      | <b>Sample type</b> |
|-------------------|-------------|-------------|----------------------------------|------------------------------|-----------------|--------------------|
| 61                | 8/8/2019    | 22h30       | "Areia Preta", "Praia Gonalo"   | 770/771                      | 9.81098(...)885 | cloaca             |
| 62                | 8/8/2019    | 22h30       | "Areia Preta", "Praia Gonalo"   | 770/771                      | 9.81098(...)885 | oral cavity        |
| 63                | 8/8/2019    | 22h30       | "Areia Preta", "Praia Gonalo"   | 770/771                      | 9.81098(...)885 | egg                |
| 64                | 8/8/2019    | 23h16       | "Areia Preta", "Praia Gonalo"   | 773/772                      | 9.81098(...)591 | cloaca             |
| 65                | 8/8/2019    | 23h16       | "Areia Preta", "Praia Gonalo"   | 773/772                      | 9.81098(...)591 | oral cavity        |
| 66                | 8/8/2019    | 23h16       | "Areia Preta", "Praia Gonalo"   | 773/772                      | 9.81098(...)591 | egg                |
| 67                | 8/8/2019    | 01h40       | "Areia Preta", "Praia Gonalo"   | 229/228                      | -               | cloaca             |
| 68                | 8/8/2019    | 01h40       | "Areia Preta", "Praia Gonalo"   | 229/228                      | -               | oral cavity        |
| 69                | 8/8/2019    | 01h40       | "Areia Preta", "Praia Gonalo"   | 229/228                      | -               | egg                |
| 70                | 8/8/2019    | 02h10       | "Areia Preta", "Praia Gonalo"   | 050/258                      | -               | cloaca             |
| 71                | 8/8/2019    | 02h10       | "Areia Preta", "Praia Gonalo"   | 050/258                      | -               | oral cavity        |
| 72                | 8/8/2019    | 02h10       | "Areia Preta", "Praia Gonalo"   | 050/258                      | -               | egg                |
| 73                | 13/8/19     | 01h04       | "Cozinha fcil", "Praia Gonalo" | 094/095                      | -               | cloaca             |
| 74                | 13/8/19     | 01h04       | "Cozinha fcil", "Praia Gonalo" | 094/095                      | -               | oral cavity        |
| 75                | 13/8/19     | 01h04       | "Cozinha fcil", "Praia Gonalo" | 094/095                      | -               | egg                |
| 76                | 13/8/19     | 02h38       | "Cozinha fcil", "Praia Gonalo" | 049/050                      | -               | cloaca             |
| 77                | 13/8/19     | 02h38       | "Cozinha fcil", "Praia Gonalo" | 049/050                      | -               | oral cavity        |
| 78                | 13/8/19     | 02h38       | "Cozinha fcil", "Praia Gonalo" | 049/050                      | -               | egg                |
| 79                | 13/8/19     | 03h10       | "Cozinha fcil", "Praia Gonalo" | 046/045                      | -               | cloaca             |
| 80                | 13/8/19     | 03h10       | "Cozinha fcil", "Praia Gonalo" | 046/045                      | -               | oral cavity        |
| 81                | 13/8/19     | 03h10       | "Cozinha fcil", "Praia Gonalo" | 046/045                      | -               | egg                |
| 82                | 13/8/19     | 03h20       | "Cozinha fcil", "Praia Gonalo" | 276/035                      | -               | cloaca             |
| 83                | 13/8/19     | 03h20       | "Cozinha fcil", "Praia Gonalo" | 276/035                      | -               | oral cavity        |
| 84                | 13/8/19     | 03h20       | "Cozinha fcil", "Praia Gonalo" | 276/035                      | -               | egg                |
| 85                | 13/8/19     | 03h44       | "Cozinha fcil", "Praia Gonalo" | 277/278                      | -               | cloaca             |
| 86                | 13/8/19     | 03h44       | "Cozinha fcil", "Praia Gonalo" | 277/278                      | -               | oral cavity        |
| 87                | 13/8/19     | 03h44       | "Cozinha fcil", "Praia Gonalo" | 277/278                      | -               | egg                |
| 88                | 16/8/19     | 22h43       | "Cozinha fcil", "Praia Gonalo" | 298/505                      | -               | cloaca             |
| 89                | 16/8/19     | 22h43       | "Cozinha fcil", "Praia Gonalo" | 298/505                      | -               | oral cavity        |
| 90                | 16/8/19     | 22h43       | "Cozinha fcil", "Praia Gonalo" | 298/505                      | -               | egg                |

Passive Integrated Transponder (PIT).

**Table S1.** *cont.*

| <b>Sample nº.</b> | <b>Date</b> | <b>Time</b> | <b>Beach/ local</b>              | <b>Animal flipper tag ID</b> | <b>PIT</b> | <b>Sample type</b> |
|-------------------|-------------|-------------|----------------------------------|------------------------------|------------|--------------------|
| 91                | 16/8/19     | 00h36       | “Cozinha fácil”, “Praia Gonçalo” | 284/283                      | -          | Cloaca             |
| 92                | 16/8/19     | 00h36       | “Cozinha fácil”, “Praia Gonçalo” | 284/283                      | -          | Oral cavity        |
| 93                | 16/8/19     | 00h36       | “Cozinha fácil”, “Praia Gonçalo” | 284/283                      | -          | Egg                |
| 94                | 16/8/19     | 01h36       | “Cozinha fácil”, “Praia Gonçalo” | 285/286                      | -          | Cloaca             |
| 95                | 16/8/19     | 01h36       | “Cozinha fácil”, “Praia Gonçalo” | 285/286                      | -          | Oral cavity        |
| 96                | 16/8/19     | 01h36       | “Cozinha fácil”, “Praia Gonçalo” | 285/286                      | -          | Egg                |
| 97                | 16/8/19     | 02h37       | “Areia preta”, “Praia Gonçalo”   | 288/287                      | -          | Cloaca             |
| 98                | 16/8/19     | 02h37       | “Areia preta”, “Praia Gonçalo”   | 288/287                      | -          | Oral cavity        |
| 99                | 16/8/19     | 02h37       | “Areia preta”, “Praia Gonçalo”   | 288/287                      | -          | Egg                |

Passive Integrated Transponder (PIT).
